# Supplementary material for: SARS-CoV-2 in wastewater from Mexico City used for irrigation in the Mezquital Valley: quantification and modelling of geographic dispersion
Source: bioRxiv or medRxiv preprint supplement (doi:10.1101/2021.06.07.21258522), 2021-06-12

## Supplementary material

### **SARS-CoV-2 in wastewater from Mexico City used for irrigation in the Mezquital Valley: quantification and modelling of geographic dispersion**

#### **Authors**

Yaxk'in Coronado<sup>1</sup>, Roberto Navarro<sup>2</sup>, Carlos Mosqueda<sup>2,3</sup>, Valeria Valenzuela<sup>2,4</sup>, Juan Pablo Perez<sup>2</sup>, Víctor González-Mendoza<sup>1</sup>, Mayra de la Torre<sup>2</sup>, Jorge Rocha<sup>1\*</sup>.

<sup>1</sup>Conacyt-Unidad Regional Hidalgo, Centro de Investigación en Alimentación y Desarrollo. Ciudad del Conocimiento y la Cultura de Hidalgo, Blvd. Santa Catarina S/N, San Agustín Tlaxiaca, Hidalgo, México, 42163

<sup>2</sup>Unidad Regional Hidalgo. Centro de Investigación en Alimentación y Desarrollo. Ciudad del Conocimiento y la Cultura de Hidalgo, Blvd. Santa Catarina S/N, San Agustín Tlaxiaca, Hidalgo, México, 42163.

<sup>3</sup>Instituto Tecnológico de Celaya. Antonio García Cubas 600, Fovissste, Celaya, Gto., 38010.

<sup>4</sup>Universidad Tecnológica de Querétaro. Av. Pie de la Cuesta 2501, Nacional, Santiago de Querétaro, Qro., 76148.

\*Corresponding author: [jorge.rocha@ciad.mx](mailto:jorge.rocha@ciad.mx)

**Supplementary file 1.** Code details, boundary conditions and description of the process for adjusting the transport model of virus in interfaces to an ordinary differential equation that describes the dispersion of SARS-CoV-2 in the Tula River.

[https://nbviewer.jupyter.org/github/yaxastro3000/COVID\\_CIAD\\_URH/blob/c65ac45af14736023e94eb087aea8d541a7dac68/MODEL\\_COVID\\_CIAD\\_URH.ipynb](https://nbviewer.jupyter.org/github/yaxastro3000/COVID_CIAD_URH/blob/c65ac45af14736023e94eb087aea8d541a7dac68/MODEL_COVID_CIAD_URH.ipynb)

## Supplementary tables

**Supplementary Table S1.** Soil samples collected for this study.

| <b>Sample</b> | <b>Date</b> | <b>Municipality</b> | <b>Coordinates</b>          | <b>Days since irrigation</b> |
|---------------|-------------|---------------------|-----------------------------|------------------------------|
| S1            | 29/09/2020  | El Salto            | 19.963483, -<br>99.301255   | 14                           |
| S2            | 29/09/2020  | Tlaxcoapan          | 20.090066, -<br>99.215945   | 10                           |
| S3            | 29/09/2020  | Tetepango           | 20.102991, -<br>99.149837   | 14                           |
| S4            | 23/09/2020  | Mangas              | 20.1909989, -<br>99.2430968 | 4                            |
| S5            | 23/09/2020  | Palmillas           | 20.215935, -<br>99.203465   | 7                            |
| S6            | 06/10/2020  | Debodhé             | 20.521108, -<br>99.133735   | 4                            |
| S7            | 06/10/2020  | Debodhé -<br>Cerro  | 20.526567, -<br>99.110138   | 4                            |

**Supplementary Table S2.** Ct values obtained from RT-qPCR detection of SARS-CoV-2 and PMMV in viral nucleic acids from soil and produce samples

| Sample            | SARS-CoV-2 (Ct) |         |             | PMMV<br>(Ct) |
|-------------------|-----------------|---------|-------------|--------------|
|                   | N1-FAM          | N2-HEX  | N3-TexasRed |              |
| S1                | ND              | ND      | ND          | 30.264921    |
| S2                | ND              | ND      | ND          | 31.091442    |
| S3                | ND              | ND      | ND          | 26.787857    |
| S4                | ND              | ND      | ND          | 29.487373    |
| S5                | ND              | ND      | ND          | 28.38734     |
| S6                | ND              | ND      | ND          | 31.776516    |
| S7                | ND              | ND      | ND          | 31.768978    |
| Milpa             | ND              | ND      | ND          | 37.909       |
| Natural landscape | ND              | ND      | ND          | ND           |
| Coriander 3       | ND              | ND      | ND          | 38.9628      |
| Lettuce 6         | ND              | ND      | ND          | 36.6487      |
| Lettuce 7         | ND              | ND      | ND          | 36.3314      |
| Broccoli M        | ND              | ND      | ND          | 32.7974      |
| Cauliflower M     | ND              | ND      | ND          | 26.0486      |
| Squash M          | ND              | ND      | ND          | 30.8299      |
| Positive control  | 23.8252         | 21.9638 | 27.3536     | NA           |
| Negative control  | ND              | ND      | ND          | ND           |

ND, not detected; NA, not determined. Numbers in produce samples correspond to locations of fields from Figure 1. M, samples collected at the Ixmiquilpan market.

**Supplementary Table S3. Physicochemical parameters of water samples from Tula river (RW) and irrigation canals (CW)**

| <b>Sample</b> | <b>BOD<br/>(mg/L)</b> | <b>COD<br/>(mg/L)</b> | <b>pH</b> | <b>TDS<br/>(mg/L)</b> | <b>SS<br/>(ml/L)</b> | <b>TSS<br/>(mg/L)</b> | <b>TS<br/>(mg/mL<br/>)</b> |
|---------------|-----------------------|-----------------------|-----------|-----------------------|----------------------|-----------------------|----------------------------|
| <b>RW1</b>    | 5.5                   | 122                   | 8.1       | 345.3                 | 0                    | 1.8                   | 347.1                      |
| <b>RW 2</b>   | 19.9                  | 244                   | 7.9       | 693                   | 1                    | 41                    | 734                        |
| <b>RW 3</b>   | 21.8                  | 219.6                 | 8.1       | 580                   | 1                    | 41                    | 621                        |
| <b>RW 4</b>   | 21.5                  | 146.4                 | 8.1       | 524                   | 1                    | 126                   | 650                        |
| <b>RW 5</b>   | 8.4                   | 30                    | 8.6       | 858.6                 | 0                    | 15                    | 873.2                      |
| <b>RW 6</b>   | 12                    | 105                   | 8.1       | 823.7                 | 0.1                  | 44.25                 | 863                        |
| <b>RW 7</b>   | 13                    | 60                    | 8.6       | 967.8                 | 0                    | 8,4                   | 976.2                      |
| <b>RW8</b>    | 12.9                  | 27.1                  | 8.6       | 1,016.00              | 0.1                  | 10.6                  | 1,027.00                   |
| <b>CW1</b>    | 35.9                  | 120                   | 7.7       | 735                   | 0                    | 49.6                  | 784.6                      |
| <b>CW2</b>    | 34                    | 210                   | 7.7       | 711.4                 | 0.8                  | 91.5                  | 802.9                      |
| <b>CW3</b>    | 19                    | 255                   | 8.1       | 1039.3                | 0.3                  | 145.5                 | 1184.8                     |
| <b>CW4</b>    | 20.6                  | 195.2                 | 8.3       | 765.3                 | 0.6                  | 67                    | 832.3                      |
| <b>CW4-II</b> | 22.7                  | 219.6                 | 8.3       | 770                   | 0.4                  | 25                    | 795                        |
| <b>CW5</b>    | 21.5                  | 60                    | 8.2       | 734.6                 | 0                    | 16.53                 | 751.1                      |
| <b>CW6</b>    | 42.6                  | 10.2                  | 9         | 1189                  | 0                    | 4                     | 1193                       |
| <b>CW7</b>    | 15.5                  | 4.5                   | 9         | 1252.4                | 0                    | 4.7                   | 1257.2                     |

BOD, Biochemical oxygen demand; COD, chemical oxygen demand; pH, Hydrogen potential, TDS, total dissolved solids; SS, suspended solids, total suspended solids; TSS, total suspended solids; TS, total solids.

**Supplementary Table S4.** Microbiological analyses of water and soil samples

| <b>Sample</b> | <b><i>Salmonella</i><br/><i>a spp.</i>*</b> | <b>TC<br/>(NMP/100mL)</b> | <b>FC<br/>(NMP/100mL)</b> | <b><i>E. coli</i><br/>(NMP/100mL)</b> |
|---------------|---------------------------------------------|---------------------------|---------------------------|---------------------------------------|
| RW1*          | Detected                                    | >110 000                  | 110 000**                 | 110 000                               |
| RW2*          | Detected                                    | 408 000 000               | 99 500 000**              | 99 500 000                            |
| RW3*          | Detected                                    | >11 500 000               | 11 500 000**              | 11 500 000                            |
| RW4*          | Detected                                    | >11 500 000               | 171 000**                 | 171 000                               |
| RW5           | Detected                                    | >11 000                   | 360                       | 360                                   |
| RW6           | Detected                                    | >11 000                   | 300                       | 300                                   |
| RW7*          | Detected                                    | >11 000                   | >11 000**                 | >11 000                               |
| RW8           | Detected                                    | 46 000                    | 1 500                     | 1 500                                 |
| CW1*          | Detected                                    | 9 200 000                 | 9 200 000**               | 9 200 000                             |
| CW2*          | Detected                                    | 23 000 000                | 3 600 000**               | 3 600 000                             |
| CW3           | Detected                                    | 9 200 000                 | <300 000**                | <300 000                              |
| CW4*          | Detected                                    | >11 500 000               | 11 500 000**              | 11 500 000                            |
| CW4-II*       | Detected                                    | 11 500 000                | 11 500 000**              | 4 080 000                             |
| CW5*          | Detected                                    | >11 000                   | >11 000**                 | >11 000                               |
| CW6           | Detected                                    | 2 700                     | 740                       | 740                                   |
| CW7           | Detected                                    | 15 000                    | 740                       | 740                                   |

TC, total coliforms; FC, fecal coliforms; MPN, most probable number.

\*PCR detection from 25 g or 25 ml of sample

\*\*Above the limits of (fecal coliforms) established in NOM-001-ECOL-1996.

## Supplementary figures

**Supplementary Figure S1.** Statistically significant correlations found between SARS-CoV-2 and physicochemical variables (top) and between SARS-CoV-2 and microbiological variables (bottom) in water samples from the Tula River.

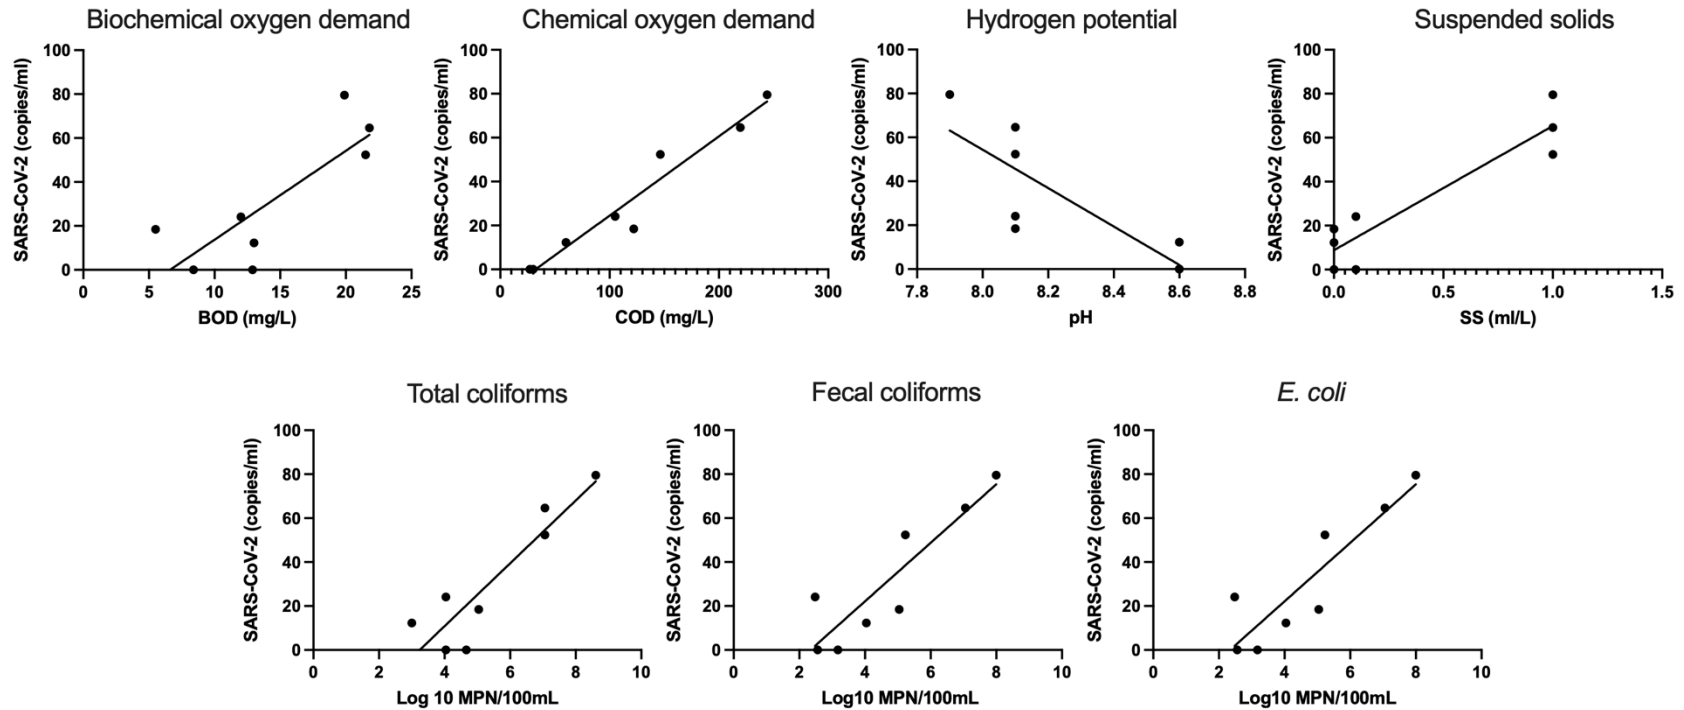

**Supplementary Figure S2.** Biodegradability index (COD/BOD) measured in Tula River, Tepeji River and Salado River, shows trends similar to those of SARS-CoV-2 concentration. Each label represents the sample location indicated in figure 1c.

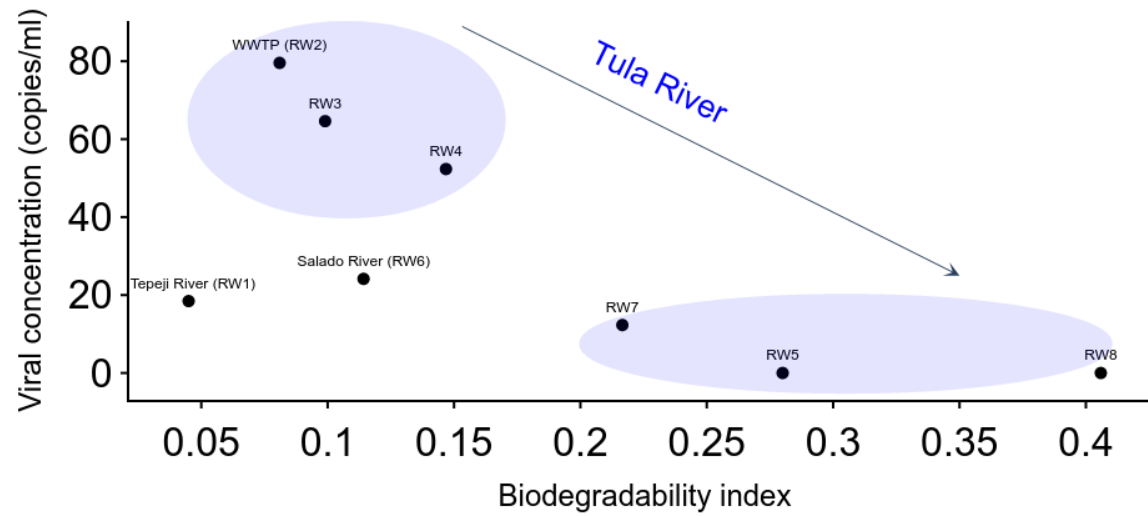

Supplement: Supplementary file [file media-1.pdf]
